1  
2  
3  
4  
5  
6  
7  
8  
9  
10  
11  
12  
13  
14  
15  
16  
17  
18  
19  
20  
21  
22  
23  
24

**Microbial Community Dynamics of a Sequentially Fed Anaerobic Digester Treating  
Solid Organic Waste**

HyunWoo Lee<sup>1,#</sup>, Temesgen M. Fitamo<sup>1,#</sup>, Camila L. Nesbø<sup>1</sup>, Nigel G. H. Guilford<sup>1</sup>, Kärt  
Kanger<sup>1,2</sup>, Minqing Ivy Yang<sup>1</sup>, and Elizabeth A. Edwards<sup>1\*</sup>

<sup>#</sup>These author (Lee and Fitamo) contributed equally to the work.

<sup>1</sup> Department of Chemical Engineering and Applied Chemistry and BioZone,  
University of Toronto, 200 College Street, Toronto, Ontario, Canada, M5S 3E5

<sup>2</sup> Faculty of Science and Technology, University of Tartu, Tartu, Estonia

\*Corresponding author (EA Edwards)

Address correspondence to:

Elizabeth A. Edwards: [elizabeth.edwards@utoronto.ca](mailto:elizabeth.edwards@utoronto.ca)

Short title: Microbial community of solid-state anaerobic digestion of mixed organic waste

References formatted as Author-Date for ease of review; to be changed if accepted

Words: ~5785 (excluding abstract and references) + 5 figures

25 **Table of Contents (TOC)/ Abstract Art:**

26  
27  
28

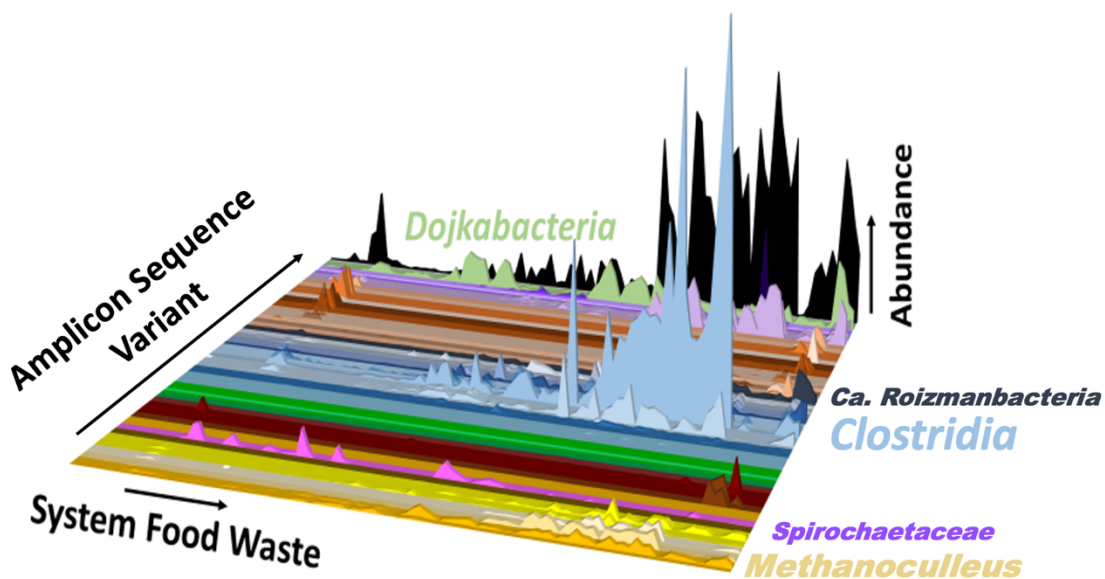

Solid-State Anaerobic Digester Treating Solid Organic Waste

29  
30  
31  
32  
33  
34  
35  
36  
37  
38  
39

40 **Abstract**

41 A 50 kg-scale high solids anaerobic digester comprising six sequentially-fed leach beds with  
42 a leachate recirculation system and an upflow anaerobic sludge blanket reactor was operated  
43 at 37°C for 88 weeks. The feedstock contained a constant fibre fraction (a mix of cardboard,  
44 boxboard, newsprint, and fine paper) and varying proportions of food waste. Significantly  
45 enhanced co-digestion and methane production from the fibres was observed as the proportion  
46 of FW was increased. The most abundant 16S rRNA amplicon sequence variant (ASV),  
47 classified as *Clostridium butyricum*, was correlated with the amount of FW in the system and  
48 total methane yield. However, methane yield specifically from the fibre fraction was  
49 significantly correlated with organisms classified as *Candidatus Roizmanbacteria* and  
50 *Spirochaetaceae*. These ASVs together with ASVs classified as *Anaerovorax* and  
51 *Methanoculleus* correlated strongly to other ASVs in the microbial community, suggesting  
52 these are vitally important for ecosystem function and methane production. In addition, tracing  
53 the fate of microbes derived from incoming food waste helped to diagnose a poor batch of  
54 bulking agent.

55

56

57

58

59 **Keywords:** Anaerobic digestion, organic fraction municipal solid waste, 16S rRNA gene  
60 amplicon, microbial communities, synergy.

## 61 **1. Introduction**

62 Anaerobic digestion (AD) is commonly used for organic waste stabilization, mass reduction  
63 and renewable natural gas production. In anaerobic digestion, complex organics are converted  
64 into biogas mainly consisting of methane (CH<sub>4</sub>) and carbon dioxide (CO<sub>2</sub>). Biogas can be  
65 burned as a fuel or to generate heat and electricity or can be upgraded to pipeline quality and  
66 fed into natural gas grids. AD of the organic solids in municipal waste, referred to as Organic  
67 Fraction Municipal Solid Waste (OFMSW) is often not competitive with alternatives such as  
68 landfilling unless regulations limit such practices. As a result, in the U.S. and Canada, with  
69 more space and fewer landfill restrictions, a very large portion (75 million tons and 12 million  
70 tonnes respectively) of OFMSW ends up in landfills (Environment and Climate Change  
71 Canada, 2020; EPA, 2020).

72 The composition of OFMSW is heterogenous, variable and complex in nature.  
73 Conventional anaerobic digesters are preceded by extensive pre-treatment steps including size  
74 reduction, contaminant removal and dilution with water to make the feedstock suitable for  
75 pumping and further processing (Guilford et al., 2019). Continuous stirred tank reactors and  
76 plug flow reactors operating under mesophilic (37°C) or thermophilic (55°C) conditions  
77 effectively digest OFMSW (De Baere and Mattheeuws, 2013; Van et al., 2020). These wet-  
78 digestion configurations have been deployed in many cities, including Toronto (Gorrie, 2019)  
79 and many conventional digesters treating wastewater secondary bio-sludge are also now  
80 accepting pureed food waste (Chattha, 2020). High solids or so-called solid-state AD  
81 technologies (SS-AD) that enclose solid waste in silos or garage-type reactors (as reviewed in  
82 Li et al., 2011 and others) can process more heterogeneous solids, but typically require longer  
83 residence times. To overcome the challenge of economic viability for OFMSW in the North

84 American context, Guilford et al. conceived of a modified SS-AD process inspired by landfill  
85 bioreactor technology (Guilford, 2009). In this new SS-AD design, OFMSW with minimal  
86 pre-treatment is placed sequentially in a series of 6 leach beds (one freshly fed leach bed per  
87 week), while leachate is recirculated to each location. A laboratory (50 Kg) scale  
88 demonstration system of this concept was built (affectionately known as “Daisy the Digester”)  
89 and operated continuously for 88 weeks (Guilford et al., 2019). An important variable  
90 impacting digestion of OFMSW is the ratio of highly digestible Food Waste (FW) to other  
91 more slowly digested fractions, particularly paper and cardboard. Over the 88 weeks of  
92 operation the mass of fibre fed to Daisy remained constant, as did the proportions of its four  
93 constituents, fine paper (FP), boxboard (BB), cardboard (CB), and newsprint (NP). Over the  
94 same period, the mass of FW fed to Daisy varied from a low of 0 to a high of 29.3% of total  
95 chemical oxygen demand (COD) in the feed. The three major findings from this 88-week  
96 experiment (reported in Guilford et al., 2019) were that: 1) the addition of FW dramatically  
97 enhanced methane production from the paper and cardboard fibre fractions, and this  
98 enhancement was proportional to the amount of FW added; 2) observed total biogas yield at  
99 typical OFMSW composition (where ~29.3% of added COD is from FW) was as high as that  
100 achieved in well-mixed stirred tank reactors; and 3) the structure of the bulking agent used  
101 (wood chips in this case) impacted performance. Guilford *et al.* (2019) referred to the enhanced  
102 methane production from fibers by virtue of co-digestion of food wastes as “synergistic”  
103 methane production. Several factors likely contributed to this synergistic methane production,  
104 including greater microbial growth on FW, activity of hydrolytic enzymes in the FW, microbial  
105 community composition, biofilm formation, and leachate distribution and recirculation.

106 The main objective of this research was an analysis of the microbial community dynamics  
107 in Daisy over this long-term experiment to try and explain the observed enhanced methane  
108 production from the fibre fractions during co-digestion with food waste. Specifically, the goal  
109 was to investigate links between the microbial community, process conditions and treatment  
110 performance. This was achieved by (i) 16S rRNA amplicon sequencing to characterize the  
111 microbial community in Daisy leachate over time, (ii) quantifying and identifying the most  
112 abundant organisms using qPCR, (iii) correlating microbial community members with digester  
113 performance parameters, particularly to methane production from fibres specifically, and (iv)  
114 assessing functions of key microbes associated with enhanced methane production.

115

## 116 **2. Materials and Methods**

### 117 **2.1 Solid state anaerobic digester configuration**

118 The sequentially fed anaerobic leach bed configuration and feeding scheme are presented in  
119 great detail in Guilford *et al.* (2019) and corresponding PhD thesis (Guilford, 2017). A brief  
120 overview is provided here. A list of component and sample nomenclature for performance  
121 metrics are provided in **Table S1** of the **supplementary information (SI)**. Daisy the anaerobic  
122 digester (**Figure S1**) consists of six leach beds (8.5 L working volume each), an up-flow sludge  
123 blanket reactor (UASB, 27.5 L working volume), Tank 1 (UASB feed tank) and Tank 2 (leach  
124 bed feed tank) each with a working volume of 17.5 L. The leach beds were sequentially batch  
125 fed at one-week intervals. The temperature in the tanks and the UASB was controlled at 37°C.  
126 The leachate was continuously recirculated and successively delivered to each of the leach  
127 beds using a leach bed feed pump and control valves (**Figure S1**). Leach beds received 560 ml  
128 of leachate every 30 minutes. Leachate was collected in Tank 1. The content of Tank 1 was

129 pumped to the UASB and the effluent from the UASB was recycled to Tank 2. Pump 2 was  
130 used to maintain hydraulic balance between Tank 1 and Tank 2. Refer to Guilford *et al.* (2019)  
131 for additional information.

## 132 **2.2 Feedstock preparation and digester operation**

133 The feedstock composition was designed to simulate an average typical mixed organic solid  
134 waste sent to landfill, which in Canada contains about 38% (wet weight) FW and 62%  
135 lignocellulosic (i.e. paper and cardboard) fibres (Mcintyre, 2007; Statistics Canada, 2010).  
136 Expressed as COD, this typical composition translates to ~17.2% COD from FW; this  
137 proportion was used as the base case in these experiments. All wastes were collected from  
138 residential waste recycling programs in Greater Toronto. The source-separated FW was  
139 shredded to less than 10 cm and stored frozen in individual bags at -20°C until use. A defined  
140 fibre blend of shredded FP, BB, CB, and NP was also prepared. Bulking agent (BA) prepared  
141 by the recycling facility from shredded ash wood was mixed into the feedstock mixture to  
142 maintain hydraulic permeability during digestion. Eight batches of BA were received over the  
143 course of 88 weeks of reactor operation.

144 The digester (**Figure S1**) was inoculated with anaerobic digester sludge from a pulp  
145 and paper mill. Each week, the oldest of the 6 leach beds in the system was replaced with a  
146 new leach bed containing fresh feed, providing a solids retention time (SRT) of six weeks. The  
147 system was operated for 88 weeks, divided into 12 periods, each period defined by a change  
148 in operation, primarily the quantity of FW added, as summarized in **Table S2a**. Initially, the  
149 proportion of FW added was 17.2% on a COD basis, which was subsequently decreased in 3  
150 stages to zero, then increased back up to 17.2% in one step, further increased to 21.7%, and

151 ultimately to 29.3% COD of FW in the final stage of operation (details in **Tables S2b & S2c**).  
152 The source, mass and composition of the fibre mixture added to each leach bed remained  
153 constant throughout as did the mass of BA (wood chips). All the waste samples were received  
154 in several batches over time.

### 155 **2.3 Sample collection and preservation for microbial analysis**

156 Between weeks 31 and 88, leachate samples were taken for DNA extraction (**Table S2d**) and  
157 eventual microbial analysis from nine ports across the reactor. These samples were collected  
158 weekly from all leach-beds, six hours after completing the installation of a new leach bed in  
159 one of the 6 leach bed locations (LL). Duplicate leachate samples (10 mL each) were collected  
160 from valves (V1-1 to V1-6) located directly below each leach bed, as well as from Tanks 1 &  
161 2 and the UASB, as shown in **Figure S1**. Each week, one additional sample called the “first  
162 flush” (labelled W0) was collected from the newly installed leach bed right after installation  
163 to capture the first liquid displaced out of the waste. Samples were labeled according to the  
164 leach bed serial number and the corresponding time in Daisy, or SRT. As an example, referring  
165 to **Figure S2 (which is a close-up of Table S2b)**, leach bed number serial number S.031 was  
166 installed in leach bed location #1 (LL01) on 10/27/2015 for six-weeks (weeks 32 to 37) before  
167 it was replaced by a new leach bed (S.037). The first flush sample taken right after installation  
168 of leach bed S.031 was labeled S31W0. The next sample was taken six hours later and labeled  
169 S31W1. Subsequent samples taken at exactly weekly intervals are labelled S31W2 to S31W6.

170 A slight change in leachate sampling workflow occurred at week 61. Prior to week 61, samples  
171 (10 mL) were collected in falcon tubes and directly placed in a -20°C freezer for later DNA  
172 extraction. However, after week 61, samples (10 mL) were first centrifuged at 7000Xg at 4°C



173 for 30 minutes (Beckman Coulter Avanti J-E Series, JLA 16.250 fixed angle rotor) and most  
174 of the supernatant was discarded. The pellets were resuspended in the 1 mL remaining  
175 supernatant and transferred to a 2 mL Safe-seal Micro Tube (Sarstedt) and further centrifuged  
176 at 13,000Xg for 15 minutes (Eppendorf Microcentrifuge 5417R). The supernatant was  
177 removed, and the pellets were stored at -80 °C for later DNA extraction. The DNA extraction  
178 method was the same for both sets of samples. A total of 111 leach bed leachate samples were  
179 collected (**Tables S2d and S3**). The samples corresponded to the first and the last leach bed  
180 of each operating period, chosen because the first leach bed reflected the immediate impact of  
181 a change in FW COD added while the last leach bed corresponded to when all six leach beds  
182 were fed same ratio of fibres to FW. First flush samples (W0) provided an estimate of the  
183 microbial community in the feed. Samples for DNA extraction were also collected from the  
184 original inoculum to Daisy (seed), from samples of FW used as feedstock, and from the  
185 feedstock mix comprised of a mix of FW and fibres. Finally, samples were also taken from 6-  
186 week-old digestate (DG), and from the sludge in the bottom of Tank 1, Tank 2 and the UASB  
187 upon decommissioning after week 88 (**Table S3**).

#### 188 **2.4 DNA Extraction and Quantitative Polymerase Chain Reaction (qPCR)**

189 DNA extractions from leachate were performed using the Qiagen DNeasy PowerSoil kit  
190 (Qiagen, Carlsbad, CA) according to the manufacturer's protocol with the following  
191 modifications: (i) instead of transferring the recommended volume of sample through step 9  
192 to 15, the entire supernatant volume was transferred for quantitative analysis and (ii) DNase-  
193 and RNase-free sterile water (Invitrogen) was used for elution instead of C6 elution buffer  
194 provided in the kit to minimize interference in downstream molecular analysis. DNA  
195 extractions from FW, leach bed feedstock mix, and DG were performed using Qiagen DNeasy

196 PowerMax DNA isolation kit according to the kit protocol. The extracted DNA from the FW,  
197 leach bed feedstock mix and DGs, nine samples in total, were further concentrated with 100%  
198 ethanol and 5 M NaCl prior to sequencing (Kanger et al., 2020). The final DNA concentration  
199 was measured by Nanodrop (NanoDrop1000 Spectrophotometer, Thermo Fisher Scientific).  
200 The absolute abundance of bacteria and archaea was determined using quantitative PCR  
201 (qPCR) with primers targeting bacterial or archaeal 16S rRNA genes as explained and  
202 provided in **Table S4**. Raw qPCR data are provided in **Tables S5a** (bacteria) and **S5b**  
203 (archaea).

## 204 **2.5 Amplicon and Shotgun Sequencing and Data Analysis**

205 DNA extracts were sent to the McGill University and Genome Quebec Innovation Center  
206 (Quebec, Canada) for amplicon sequencing using the Illumina MiSeq system and the V3  
207 reagent kit with primers targeting the V6-V8 regions of the 16S rRNA gene, with sequences  
208 926f-modified: 5'-AAACTYAAAKGAATWGRCGG-3' and 1392r-modified: 5'-  
209 ACGGGCGGTGWGTRC-3' (Qiao et al., 2020). The raw amplicon sequence data were  
210 submitted to the National Centre for Biotechnology Information's (NCBI) sequence read  
211 archive (SRA) database under Bio-Project PRJNA501900. Shotgun metagenomes of select  
212 DNA samples from Daisy were also previously sequenced using Illumina technology as  
213 described in Kanger et al., 2020, and this data is available in the Joint Genome Institute GOLD  
214 database under Gs0130338, study name: metagenomes from anaerobic digester of solid waste.

215 The raw amplicon sequences obtained from Genome Quebec were processed and  
216 analyzed using QIIME2 version 2019.10 (Bolyen et al., 2019). After trimming the primer  
217 region with the cutadapt plug-in, amplicon sequence variants (ASVs) were generated using the

218 DADA2 plug-in with the following settings: p-trunc-len-f = 260, p-trunc-len-r = 240 or 220  
219 bp, p-max-ee = 2. The amplicon sequencing summary statistics are provided in **Table S6**. The  
220 resulting data set was subsampled to an equal depth of 14,900 reads per sample prior to analysis  
221 to minimize the bias caused by different read-depth. Taxonomic classification was performed  
222 using the Silva-132-99-nb classifier trained on the 926f and 1392r primer set. All ASVs,  
223 corresponding sequences, and taxonomic classifications are provided in **Table S7**.

224 The V6-V8 primers recover both bacterial and archaeal sequences, as well as some 18S  
225 sequences from eukaryotes. The relative abundance of ASVs in each domain was calculated  
226 by dividing number of reads for a given bacterial ASV by the total number of bacterial reads,  
227 repeated for archaeal reads (**Table S7**). For graphing, genera with > 5% relative abundance in  
228 any sample were identified and grouped while the remaining ASVs were clustered together as  
229 “Others” (**Table S8**) and the resulting bar graph for all leachate samples is provided in **Figure**  
230 **S13**. Finally, the absolute abundance of each ASV was estimated by multiplying bacterial or  
231 archaeal relative abundance by the total bacterial or archaeal abundance measured by qPCR  
232 (**Table S9**).

## 233 **2.6 Measurements of Process Parameters and Reactor Performance**

234 A detailed account of the many process parameters measured in Daisy was previously reported,  
235 including biogas and methane production, and leachate analyses for total and volatile solids  
236 (TS/VS), COD, pH, alkalinity ratio, volatile fatty acids (VFAs), sulfate, and inorganic salt  
237 concentrations (Guilford *et al.*, 2019). The total volume of biogas produced was continuously  
238 measured using two independent wet-tip gas meters, one serving the leach beds and tanks  
239 combined and the other the UASB alone. Biogas composition was analyzed regularly, and

240 volumes converted to methane at STP. The methane produced specifically from the fibres (**FB-**  
241 **Methane**) was calculated as the total methane produced minus the maximum possible methane  
242 that could be produced from added FW assuming 78% COD<sub>FW</sub> conversion (**Figure S3** and  
243 **Table S10**). The 78% maximum conversion efficiency for FW COD was verified in  
244 independent biochemical methane potential tests (Guilford *et al.*, 2019).

## 245 **2.7 Correlation and statistical Analyses**

246 Both the relative abundance and the absolute abundance of microbial taxa were analyzed using  
247 the Phyloseq package V1.26 (McMurdie and Holmes, 2013) in R (R Core Team, 2013).  
248 Ordination analyses were performed using Non-Metric Multidimensional scaling (NMDS) on  
249 Bray-Curtis distances calculated from the absolute or relative abundance data. All available  
250 operating and measured process variables were included as metadata (**Table S11**). A network  
251 of 100 ASVs with highest absolute abundance and metadata was constructed using the CoNet  
252 application in Cytoscape (Faust and Raes, 2016) and the co-occurrence network model was  
253 displayed with Cytoscape 3.7 (Shannon *et al.*, 2003). Four methods were used to assess the  
254 relationship between ASVs and metadata: Bray Curtis distances, Mutual information, Pearson,  
255 and Spearman correlations, and three methods were required to support each edge (lines  
256 connecting ASVs and metadata in the network diagram). Significance of the edges was  
257 assessed using the combination of permutations and bootstrapping described in Faust and Raes  
258 (2016). The initial network contained 1,000 positive and 1,000 negative edges consistent  
259 across all four correlation measures. For each measure and each edge, 1,000 renormalized  
260 permutation and bootstrap scores were generated. P-values for each method were merged and  
261 edges with a false discovery rate (FDR) value < 0.01 were retained. In a second, more stringent  
262 analysis, the p-values were not merged for each method before retaining edges with FDR <

263 0.01, and three methods were required to support each edge. Generalized Linear Model (GLM)  
264 analysis was performed in SAS studio 3.8 (SAS version 9.04, 2018) to visualize the correlation  
265 of the 100 most abundant ASVs using absolute abundance and process metadata. The ASVs  
266 were considered as traits and analyzed separately but iteratively with the GLM. Bonferroni  
267 adjustment method was used to make correction for multiple comparisons (Aickin and Gensler,  
268 1996; Bender and Lange, 2001).

269

### 270 **3. Results and Discussion**

#### 271 **3.1 Overview of system performance and associated microbial community shifts**

272 Amplicon sequencing of the SSU rRNA gene was conducted on 131 samples from Daisy as  
273 the amount and proportion of FW was varied (**Table S3**). A total of 7466 ASVs were identified  
274 (**Table S7**). System performance and underlying leachate microbial community profiles are  
275 illustrated in **Figure 1**. Biogas production (red line) tracked the amount of FW fed to Daisy  
276 (green line) as a function of time (in weeks) overlaying corresponding microbial community  
277 profiles (relative abundance) from weekly representative leachate samples, omitting first flush  
278 samples. Each leach bed received a constant amount of fibre, which comprised the majority of  
279 the COD added, and the basal gas produced at 0 %FW (weeks 46-49) is from digestion of  
280 fibres alone. The microbial community sampled weekly was reproducible and shifted  
281 progressively as the %FW in the system changed. Given that leachate is recirculated to all  
282 leach beds regardless of their age, the data do show that good mixing is occurring in the system,  
283 despite the stationary nature of the solid substrates. The microbial community composition  
284 was found to be very different when no FW was added, seemingly to be more enriched in  
285 *Candidatus Dojkabacteria* (previously referred to as WS6) (green bars in **Fig.1**),

286 *Kineosporiaceae* (pink bars), and methanogens (yellow bars), while at high FW, the  
287 community was dominated by *Clostridia* and *Spirochaetacea* (Blue and purple bars in **Fig. 1**).  
288 Samples of the inoculum and of the food waste before digestion were also analyzed (**Figure**  
289 **S4**). Microbes derived from food waste (mainly *gamma proteobacteria* shown in brown  
290 shades) were only present in “first flush” samples corresponding to the first liquid drained  
291 from a newly installed leach bed (**Figure S5**) and in leachate samples during a period of  
292 unexpectedly poor performance (low biogas production; weeks 61-63 in **Figure 1**), previously  
293 attributed to the use of a batch of BA with a different morphology (Batch #5) during this time  
294 (Period 5b: “Odd BA” Guilford, 2019). Other than during this period, the microbial phylotypes  
295 detected in the leachate samples all originated from the original pulp mill inoculum and not  
296 from the food waste (**Figure S4**). None of the microbes from food waste were found to  
297 proliferate in Daisy, consistent with our previous study of antimicrobial genes in Daisy  
298 (Kanger et al., 2020). This overview of the microbial data prompted a deeper investigation of  
299 the relationships between the microbial community and process parameters.

300

### 301 **3.2 Most abundant taxa illustrating a pitfall of relative abundance estimates**

302 Absolute microbial abundance measurements are more relevant to understanding process  
303 kinetics because the rate of reaction is proportional to biomass concentrations. The absolute  
304 abundance of each bacterial and archaeal phylotype was calculated using qPCR measured  
305 bacterial and archaeal total abundances combined with relative abundance data from amplicon  
306 sequencing. **Figure 1** re-plotted using absolute abundance of bacteria (**Figure S6a**) and  
307 archaea (**Figure S6b**). These plots clearly show that absolute abundance of both total bacteria  
308 and total archaea track methane production and FW proportion very closely. Strikingly, in this

309 view, the seemingly high relative abundance of *Djokobacteria* (green bars) observed when  
310 there was little FW in the system really corresponded to low absolute numbers of these  
311 organisms. In fact, the absolute abundance of *Djokobacteria* does not change much with  
312 changing process conditions (**Figure S6a**). This observation illustrates a common pitfall when  
313 relying only on relative abundance profiles.

314 The most abundant bacterial taxa, based on qPCR and amplicon data, belonged to the  
315 class *Clostridia* (1860 ASVs) and the *Spirochaetia* (382 ASVs), together accounting for more  
316 than 50% of the bacterial community (**Figure S6a**). *Methanosaeta*, *Methanolinea*,  
317 *Methanoculleus* and *Methanobacterium* were the most abundant archaeal genera (**Figure**  
318 **S6b**). The microbial communities of the sludge from the tanks and UASB and the DG at high  
319 FW were also dominated by methanogens that seem to be in higher abundance in sludge and  
320 digestate than in leachate (**Figure S7**). The data also revealed a shift in the methanogenic  
321 community from *Methanobacterium* at low % FWCOD to a more diverse community at higher  
322 % FW COD including acetoclastic *Methanosaeta* and hydrogenotrophic *Methanoculleus*.  
323 Given that the amplicon primers used to capture both eukaryotic and prokaryotic sequences,  
324 the FW also comprised 10-25% of plant-derived sequences (**Figure S4**), including both plant  
325 18S rRNA sequences and 16S rRNA sequences associated with *Chloroplasts*. The remainder  
326 comprised 16S rRNA sequences attributed to various *Gammaproteobacteria*. Archaea were  
327 absent in these feed samples.

328 Although more informative, quantitative data from qPCR still does not accurately  
329 reflect the mass of the respective cell types because cell size and number of 16S rRNA genes  
330 per genome are not considered. The observed order of magnitude higher copies for total

331 bacteria relative to total archaea (**Figures S6a vs S6b**) most likely reflects that Clostridia have  
332 an average 10 copies of the 16S rRNA gene per cell while methanogens average only 1 to 2  
333 copies per cell (Stoddard et al., 2015).

334

### 335 **3.3 Ordination analysis**

336 NMDS ordinations were performed for all ASVs using both absolute and relative abundance  
337 data and the results are shown in **Figure 2** and **Figure S8**, respectively. While both ordinations  
338 showed similar clustering, the ordination based on absolute abundances was chosen for greater  
339 relevance to process parameters. The NMDS ordination (**Figure 2**) revealed that samples  
340 clustered along the X-axis from right (orange) to left (grey) as digestion progressed. Samples  
341 further clustered according to % FW COD added along the Y-axis from the bottom (no FW;  
342 pale blue) to the top (high FW; dark green). The microbial communities of “first flush” samples  
343 (ending with W0), collected from each new leach bed upon installation, clustered closest to  
344 those in FW samples. A unique set of data, coloured in pink in **Figure 2**, correspond to samples  
345 from the period with poor performance related to BA Batch #5 and are further discussed below.  
346 The same ordination, coloured instead by weeks of digestion (i.e., solids retention time or  
347 SRT), is shown in **Figure S9**. In this view, samples taken six hours after feeding (ending with  
348 W1) to samples collected at week 6 (ending with W6), are distributed from right to left  
349 according to SRT and from bottom to top according to % FW. Overall, these data illustrate the  
350 very tight connection between the microbial communities in the leach bed leachate and process  
351 operating conditions.

352



### 353 3.4 Impact of bulking agent (BA)

354 By week 57, the supply of BA Batch #4 was running low, and so Batch #5 was used. As  
355 reported in Guilford et al., (2019), digester performance immediately began to decline, as can  
356 be seen by the drop in biogas production, particularly during weeks 61-63 (**Figure 1**; BA Batch  
357 #5 period). The drop in performance was attributed to the physical properties of the particular  
358 batch of BA, specifically morphology, since no other changes had been made. Performance  
359 was restored by reverting to Batch #4, followed by Batch #6 (with similar specifications as  
360 Batch #4) (**Figure S10**). Why did BA#5 have such an impact? As noted previously, a  
361 significant difference in the microbial composition of leachate samples coincided with this  
362 period. These leachate samples contained significant proportions of FW-derived microbes,  
363 even after many weeks of digestion (**Figure S5**). This can also be seen in the NMDS ordination  
364 (**Figure 2**) where BA#5 samples clustered more closely to flush and FW samples, regardless  
365 of their SRT. The community composition reverted to a more typical composition when the  
366 BA was changed back (**Figure S5**). The shorter and coarser features of BA#5 (**Figure S10**)  
367 not only resulted in higher permeability and lower water retention, but clearly also impacted  
368 the microbial community, which in turn affected performance. Specifically, the higher  
369 permeability likely resulted in greater channelling within the leached solids and less effective  
370 distribution of recirculating leachate, explaining why FW derived microbes could still be seen  
371 in samples of leachate even after 3, 4 or 5 weeks (**Figure S5**). These data highlight the  
372 importance of the BA and associated hydrodynamics for adequate performance of high solids  
373 digesters. While the impact of BA#5 was reversible and the bacterial community rebounded,  
374 it seemed to have caused in a shift in dominant hydrogenotrophic methanogens from  
375 *Methanobacterium* to *Methanoculleus* over this period.

### 376 **3.5 Which organisms correlate to enhanced biogas production from fibres?**

377 Guilford et al., (2019) observed that the addition of FW to Daisy greatly enhanced methane  
378 production from fibre fractions and referred to this observation as “synergy” (**Figure 3**). To  
379 investigate the relationship between microbial community composition and methane  
380 production from FW and from fibres, a co-occurrence network of the 100 most abundant ASVs  
381 (**Table S9**) and the entire set of process metadata (**Table S11**) was constructed for the leachate  
382 samples. The full network, with edges supported by at least three of four correlation methods  
383 used and a merged false discover rate (FDR) < 0.01, is shown in **Figure S11**. Concentrations  
384 of VFAs and sulfate, and pH and alkalinity ratio were not correlated with community  
385 composition, consistent with these being stable throughout the experimental period. In  
386 contrast, metadata related to methane production and amount of FW in the system were  
387 significantly correlated with ASVs (**Figure S11**). These metadata included total methane  
388 (liters per week), overall methane yield (L Methane /kg COD added), methane yield  
389 specifically from fibres (L methane from fibres/kg FBCOD added, labeled FB-Methane Yield)  
390 and total system FW (i.e., the sum of FW COD in the 6 installed leach beds at time of sampling,  
391 labeled FW6LB). A subnetwork shown in **Figure 4A** was constructed including only the  
392 eleven ASVs that were significantly correlated with process metadata. Among these ASVs,  
393 eight were correlated with FB-methane yield: *Clostridium butyricum* (ASV4124), *Clostridium*  
394 *sensu stricto* 1 (ASV4109), *Anaerovorax* (ASV2339), *Spirochaetaceae* (ASV596),  
395 *Candidatus Roizmanbacteria* (ASV6579 and ASV6584), *Methanosarcina* (ASV6270), and  
396 *Methanoculleus* (ASV6332). All eight ASVs were also correlated with the amount of FW  
397 available in the system. Moreover, *Anaerovorax* (ASV2339), *Spirochaetaceae* (ASV596),  
398 *Candidatus Roizmanbacteria* (ASV6584) and *Methanoculleus* (ASV6332) were the ASVs

399 with highest number of positive connections in the full network (50-43 positive connections  
400 compared to an average of 18), suggesting they may also be hub-species important for  
401 ecosystem structure and function (Bussi and Gutierrez, 2019).

402 A more stringent subnetwork (**Figure 4B**) was created where at least three correlation  
403 measures must be significant based on unmerged or individual FDR-values. The highly  
404 abundant *Clostridium butyricum* ASV (ASV4124), which was significantly correlated to all  
405 four metadata categories in **Figure 4A**, only correlated with FW in the system and total  
406 methane but not with FB-methane yield or overall methane yield in **Figure 4B**. In this more  
407 stringent network, only *Spirochaetaceae* (ASV596) and *Candidatus Roizmanbacteria*  
408 (ASV6579) were correlated specifically with FB-Methane yield. This more stringent network  
409 also reveals most significant correlations between ASVs, discussed in Section 3.6.

410 The correlation between the microbial populations identified in the network analysis  
411 and FB-methane yield were further examined and validated using GLMs (**Table S12**). These  
412 analyses confirmed a strong correlation between the set of organisms identified in the network  
413 and FB-Methane Yield (Pearson correlation  $r$  0.70 - 0.83) (**Figure 5 and Figure S12**).  
414 Interestingly, the ASV with the highest correlation coefficient was *Candidatus*  
415 *Roizmanbacteria* (ASV6584) (**Figure 5**), suggesting that this phylotype may be particularly  
416 important for conversion of fibres to methane in the presence of food waste. Finally,  
417 confirming early observations based on qPCR abundances, *Candidatus Dojkabacteria* (WS6)  
418 shows very poor correlation with FB-Methane Yield or food waste in Daisy (**Figure 5**).

419

### 420 3.6 Ascribing roles to major microorganisms in Daisy

421 Not surprisingly, *Firmicutes*, particularly *Clostridiales*, were present in high relative and  
422 absolute abundances in Daisy, re-affirming their importance in solid waste digestion.  
423 *Firmicutes* often produce lipases, proteases, and other extracellular enzymes to facilitate  
424 hydrolysis and acidogenesis (Leven et al., 2007; Rintala and Puhakka, 1994). *Clostridia* are  
425 often reported as important microbes in AD, for example in reactors treating organic household  
426 wastes (Cardinali-Rezende et al., 2009) and corn straw (Qiao et al., 2013). The ASV classified  
427 as *C. butyricum* (ASV4124) was the most abundant bacterial lineage in most leachate samples,  
428 accounting for as much as 70% of the community at the highest loading of FW COD (sample  
429 S81W1). The abundance of *C. butyricum* ASV4124 is likely overestimated by at least a factor  
430 of 2 relative to other bacteria, as strains of this organism contain 8-12 rRNA copies in their  
431 genome (Mo et al., 2015; Stoddard et al., 2015), more than twice of the average copy number  
432 (i.e., 4.2) observed for bacteria (Větrovský and Baldrian, 2013). *C. butyricum* are fermenters  
433 known to produce hydrogen and organic acids during degradation of organic substrates,  
434 especially carbohydrates (Liu et al., 2012). In agreement with this, the network analyses  
435 suggested that *C. butyricum* ASV4124 was significantly correlated with FW, even when  
436 applying the most stringent correlation criteria (**Figure 4B**). Therefore, we hypothesize that *C.*  
437 *butyricum* ASV4124 was mainly growing on the FW, and perhaps not the lignocellulose fibres  
438 in the feed.

439 Several candidate taxa were also prominent in the Daisy microbiome. Two ASVs  
440 annotated to *Candidatus Roizmanbacteria* (ASV6579, ASV6584) were significantly  
441 correlated with all bioprocess metadata (**Figure 4A**), and ASV6579 was one of the only two  
442 ASVs significantly correlated with FB-methane yield in the most stringent network (**Figure**

443 **4B)**. Moreover, both *Ca. Roizmanbacteria* ASVs showed high levels of connection to other  
444 ASVs, i.e., with 45 and 28 connections in the full network (**Figure S11**). *Ca. Roizmanbacteria*  
445 have been suggested to be symbionts, capable of metabolizing various complex carbon  
446 substrates such as cellulose and have also been reported to be involved in lipid metabolism and  
447 to produce lactate for other microorganisms (Campanaro et al., 2019; Geesink et al., 2020).  
448 Geesink et al., 2020 suggested that these bacteria, in addition to plant materials, also utilize  
449 dead microbial biomass. Thus, in the Daisy ecosystem *Ca. Roizmanbacteria* are likely  
450 important ‘connecting’ organisms, producing lactate and degrading cellulose and dead cell  
451 biomass.

452 The ASV annotated as *Spirochaetaceae* (ASV596) was also connected to FB-methane  
453 yield and system FW (FW6LB) (**Figures 4A and 4B**) and was the ASV with the most  
454 connections in the overall network (52 connections, supplemental **Figure S11**). Thus, these  
455 *Spirochaetaceae* appear to provide essential functions in the Daisy microbial community and  
456 possibly in the synergistic FB-methane production. *Spirochaetaceae* have been observed in  
457 anaerobic digesters treating sludge (Chouari et al., 2005) and digester fed with starch, glucose,  
458 ethanol, lactate, acetate, propionate, butyrate, succinate, and formate (Delbès et al., 2000).  
459 *Spirochaetes* have been suggested to be involved in syntrophic acetate oxidation in anaerobic  
460 digesters in association with hydrogenotrophic methanogenesis (Lee et al., 2015, 2013). Fibre-  
461 associated *Spirochaetes* were also reported to be major hemicellulose degraders in hindgut of  
462 wood-feeding higher termites (Tokuda et al., 2018). The strong correlation of *Spirochaetaceae*  
463 ASV596 with FB-methane yield (**Figure 5**) suggests that they may also be capable of  
464 degradation and use of lignocellulosic fibres and produce acetate, H<sub>2</sub> and CO<sub>2</sub> to facilitate  
465 syntrophic methane production. Shotgun metagenome sequencing was performed on select

466 samples (**Table S3**). The analysis of metagenome-assembled genomes (MAGs) from Daisy is  
467 out of the scope of this paper, but a preliminary survey of possible MAGs for *Ca.*  
468 *Roizmanbacteria* and *Spirochaetaceae* revealed many genes for cellulose degradation and  
469 other carbohydrate active enzymes, consistent with these correlations.

470 Two archaeal ASVs, annotated as *Methanoculleus* (ASV6332) and *Methanosarcina*  
471 (ASV6270), were significantly correlated with FB-methane yield (**Figure 4A**).  
472 *Methanosarcina* are versatile methanogens that utilize acetoclastic, hydrogenotrophic and  
473 methylotrophic methanogenesis pathways for growth and methane production (Singh et al.,  
474 2005; Sowers et al., 1984; Town and Dumonceaux, 2016; Von Klein et al., 2002).  
475 *Methanoculleus* metabolize formate, alcohols, and H<sub>2</sub>/CO<sub>2</sub> to methane and usually require  
476 acetate as carbon source (Chen et al., 2015; Dianou et al., 2001; Lai, 2019; Maus et al., 2012).  
477 In the more stringent network in **Figure 4B**, two *Methanoculleus* ASVs (ASV6332 and  
478 ASV6331) are connected to *Spirochaetaceae* ASV596, suggesting a possible syntrophic  
479 relationship between these organisms. The different methanogens revealed in the networks of  
480 Figure 4 are known to make use a variety of substrates and likely contributed to the stability  
481 of Daisy by consuming H<sub>2</sub>, acetate and formate and making otherwise difficult fermentations  
482 thermodynamically possible. In particular, the close relationship between *Spirochaetaceae* and  
483 *Methanoculleus* suggests metabolites produced by *Spirochaetaceae*, during degradation are  
484 consumed by *Methanoculleus*. We observed that Daisy was remarkably stable even at elevated  
485 FW COD added and never experienced build-up of volatile fatty acids or pH upset. We also  
486 noted that *Methanobacterium* were prevalent at lower food waste while *Methanoculleus*  
487 became abundant at higher food waste. This switch also occurred around the time of the odd  
488 bulking agent.

489 ASVs classified as *Candidatus Dojkabacteria*, particularly ASV6777, did not show  
490 significant correlation to methane production or how much food waste was added to Daisy in  
491 our network analysis (**Figure 5**); yet as previously noted, were present at high relative  
492 abundance at low FW. *Cand. Dojkabacteria* have been observed in digesters treating corn  
493 straw (Qiao et al., 2011), sewage sludge (Liu et al., 2016) and swine sludge (Cardinali-Rezende  
494 et al., 2012), yet their function is not known. They have been shown to encode form II/III  
495 RubisCO genes used in light independent CO<sub>2</sub> incorporation into sugars derived from  
496 nucleotides (Wrighton et al., 2016). Based on literature findings and our data, we proposed  
497 that these organisms in Daisy are well adapted to persisting at low nutrient levels such as with  
498 limited FW.

#### 499 **4. Conclusion**

500 Enhanced production of methane from lignocellulosics fibres when co-digested with food  
501 waste (termed “synergistic” methane production) was linked to an order of magnitude or more  
502 increase in absolute microbial abundance as food waste proportion increased. Moreover, very  
503 specific microbial taxa (ASVs) were implicated via multiple analyses. These taxa connected  
504 all of the digestion stages from hydrolysis, through various fermentations to methanogenesis.  
505 The community became progressively and stably enriched in these taxa as food waste  
506 increased. Most significant phylotypes at higher food waste included hydrolytic and  
507 fermentative bacteria from *Clostridium* sensu stricto particularly *Clostridium butyricum*,  
508 *Anaerovorax*, *Candidatus Roizmanbacteria*, and *Spirochaetaceae* in association with  
509 *Methanoculleus* and *Methanosarcina*. The robustness of the microbial community and  
510 associated digestion process is well illustrated by how quickly performance rebounded

511 following a period of bad bulking agent, and by the high overall methane yield obtained in this  
512 high-solids anaerobic digestion configuration treating typical organics from municipal waste.

513

## 514 **5. Acknowledgements**

515 This research was funded by the Natural Sciences and Engineering Research Council of  
516 Canada (Collaborative Research and Development Grant) and by Miller Waste Systems Inc.  
517 We thank Charlie Cassin of Miller Waste Systems for preparing and providing feed samples.  
518 We thank Cristina Sartori (Researcher at University of Padova, Italy) for providing training in  
519 GLM analysis. We thank Shen Guo, Endang Susilawati, Line Lomheim and Vinthiya  
520 Paramananthasivam (BioZone, University of Toronto) for providing technical and  
521 administrative support during this extensive research project.

522

## 523 **6. References**

524 Aickin, M., Gensler, H., 1996. Adjusting for multiple testing when reporting research results:  
525 The Bonferroni vs Holm methods. *Am. J. Public Health* 86, 726–728.  
526 <https://doi.org/10.2105/AJPH.86.5.726>  
527 Bender, R., Lange, S., 2001. Adjusting for multiple testing - When and how? *J. Clin.*  
528 *Epidemiol.* 54, 343–349. [https://doi.org/10.1016/S0895-4356\(00\)00314-0](https://doi.org/10.1016/S0895-4356(00)00314-0)  
529 Bolyen, E., Rideout, J.R., Dillon, M.R., Bokulich, N.A., Abnet, C.C., Al-Ghalith, G.A.,  
530 Alexander, H., Alm, E.J., Arumugam, M., Asnicar, F., Bai, Y., Bisanz, J.E., Bittinger,  
531 K., Brejnrod, A., Brislawn, C.J., Brown, C.T., Callahan, B.J., Caraballo-Rodríguez,  
532 A.M., Chase, J., Cope, E.K., Da Silva, R., Diener, C., Dorrestein, P.C., Douglas, G.M.,  
533 Durrall, D.M., Duvallet, C., Edwardson, C.F., Ernst, M., Estaki, M., Fouquier, J.,  
534 Gauglitz, J.M., Gibbons, S.M., Gibson, D.L., Gonzalez, A., Gorlick, K., Guo, J.,  
535 Hillmann, B., Holmes, S., Holste, H., Huttenhower, C., Huttley, G.A., Janssen, S.,  
536 Jarmusch, A.K., Jiang, L., Kaehler, B.D., Kang, K. Bin, Keefe, C.R., Keim, P., Kelley,  
537 S.T., Knights, D., Koester, I., Kosciulek, T., Kreps, J., Langille, M.G.I., Lee, J., Ley, R.,  
538 Liu, Y.X., Loftfield, E., Lozupone, C., Maher, M., Marotz, C., Martin, B.D., McDonald,  
539 D., McIver, L.J., Melnik, A. V., Metcalf, J.L., Morgan, S.C., Morton, J.T., Naimey,  
540 A.T., Navas-Molina, J.A., Nothias, L.F., Orchanian, S.B., Pearson, T., Peoples, S.L.,  
541 Petras, D., Preuss, M.L., Pruesse, E., Rasmussen, L.B., Rivers, A., Robeson, M.S.,



- 542 Rosenthal, P., Segata, N., Shaffer, M., Shiffer, A., Sinha, R., Song, S.J., Spear, J.R.,  
543 Swafford, A.D., Thompson, L.R., Torres, P.J., Trinh, P., Tripathi, A., Turnbaugh, P.J.,  
544 Ul-Hasan, S., van der Hoof, J.J.J., Vargas, F., Vázquez-Baeza, Y., Vogtmann, E., von  
545 Hippel, M., Walters, W., Wan, Y., Wang, M., Warren, J., Weber, K.C., Williamson,  
546 C.H.D., Willis, A.D., Xu, Z.Z., Zaneveld, J.R., Zhang, Y., Zhu, Q., Knight, R.,  
547 Caporaso, J.G., 2019. Reproducible, interactive, scalable and extensible microbiome  
548 data science using QIIME 2. *Nat. Biotechnol.* [https://doi.org/10.1038/s41587-019-0209-](https://doi.org/10.1038/s41587-019-0209-9)  
549 9
- 550 Bussi, C., Gutierrez, M.G., 2019. From hairballs to hypotheses—biological insights from  
551 microbial networks. *FEMS Microbiol. Rev.* 43, 341–361.  
552 <https://doi.org/10.1093/FEMSRE>
- 553 Campanaro, S., Treu, L., Rodriguez-R, L., Kovalovszki, A., Ziels, R., Maus, I., Zhu, X.,  
554 Kougias, P., Basile, A., Luo, G., Schlüter, A., Konstantinidis, K., Angelidaki, I., 2019.  
555 The anaerobic digestion microbiome: a collection of 1600 metagenome-assembled  
556 genomes shows high species diversity related to methane production. *Anaerob. Dig.*  
557 *microbiome a Collect. 1600 metagenome-assembled genomes shows high species*  
558 *Divers. Relat. to methane Prod.* 680553. <https://doi.org/10.1101/680553>
- 559 Cardinali-Rezende, J., Debarry, R.B., Colturato, L.F.D.B., Carneiro, E. V., Chartone-Souza,  
560 E., Nascimento, A.M.A., 2009. Molecular identification and dynamics of microbial  
561 communities in reactor treating organic household waste. *Appl. Microbiol. Biotechnol.*  
562 84, 777–789. <https://doi.org/10.1007/s00253-009-2071-z>
- 563 Cardinali-Rezende, J., Pereira, Z.L., Sanz, J.L., Chartone-Souza, E., Nascimento, A.M.A.,  
564 2012. Bacterial and archaeal phylogenetic diversity associated with swine sludge from  
565 an anaerobic treatment lagoon. *World J. Microbiol. Biotechnol.* 28, 3187–3195.  
566 <https://doi.org/10.1007/s11274-012-1129-8>
- 567 Chattha, S., 2020. Municipal Co-digestion—How a Provincial-Scale Initiative is Helping  
568 Reduce GHG Emissions [WWW Document]. URL  
569 [https://www.watercanada.net/feature/municipal-co-digestion-how-a-provincial-scale-](https://www.watercanada.net/feature/municipal-co-digestion-how-a-provincial-scale-initiative-is-helping-reduce-ghg-emissions/)  
570 [initiative-is-helping-reduce-ghg-emissions/](https://www.watercanada.net/feature/municipal-co-digestion-how-a-provincial-scale-initiative-is-helping-reduce-ghg-emissions/) (accessed 11.17.21).
- 571 Chen, S.C., Chen, M.F., Lai, M.C., Weng, C.Y., Wu, S.Y., Lin, S., Yang, T.F., Chen, P.C.,  
572 2015. *Methanoculleus sediminis* sp. nov., a methanogen from sediments near a  
573 submarine mud volcano. *Int. J. Syst. Evol. Microbiol.* 65, 2141–2147.  
574 <https://doi.org/10.1099/ijs.0.000233>
- 575 Chouari, R., Le Paslier, D., Daegelen, P., Ginestet, P., Weissenbach, J., Sghir, A., 2005.  
576 Novel predominant archaeal and bacterial groups revealed by molecular analysis of an  
577 anaerobic sludge digester. *Environ. Microbiol.* 7, 1104–15.  
578 <https://doi.org/10.1111/j.1462-2920.2005.00795.x>
- 579 De Baere, L., Mattheeuws, B., 2013. Anaerobic Digestion of the Organic Fraction of  
580 Municipal Solid Waste in Europe Anaerobic Digestion of the Organic Fraction of  
581 Municipal Solid Waste in Europe—Status, Experience and Prospects. *Waste Manag.*  
582 *Recycl. Recover. T.S. Thomé-Kozmiensky Karl J.* 3, 517–526.
- 583 Delbès, C., Moletta, R., Godon, J.J., 2000. Monitoring of activity dynamics of an anaerobic  
584 digester bacterial community using 16S rRNA polymerase chain reaction-ingle-strand  
585 conformation polymorphism analysis. *Environ. Microbiol.* 2, 506–515.  
586 <https://doi.org/10.1046/j.1462-2920.2000.00132.x>
- 587 Dianou, D., Miyaki, T., Asakawa, S., Morii, H., Nagaoka, K., Oyaizu, H., Matsumoto, S.,

- 588 2001. *Methanoculleus chikugoensis* sp. nov., a novel methanogenic archaeon isolated  
589 from paddy field soil in Japan, and DNA-DNA hybridization among *Methanoculleus*  
590 species. *Int. J. Syst. Evol. Microbiol.* 51, 1663–1669. [https://doi.org/10.1099/00207713-](https://doi.org/10.1099/00207713-51-5-1663)  
591 [51-5-1663](https://doi.org/10.1099/00207713-51-5-1663)
- 592 Environment and Climate Change Canada, 2020. National Waste Characterization Report  
593 [WWW Document]. URL  
594 [https://publications.gc.ca/collections/collection\\_2020/eccc/en14/En14-405-2020-](https://publications.gc.ca/collections/collection_2020/eccc/en14/En14-405-2020-eng.pdf)  
595 [eng.pdf](https://publications.gc.ca/collections/collection_2020/eccc/en14/En14-405-2020-eng.pdf) (accessed 1.18.22).
- 596 EPA, U., 2020. National Overview: Facts and Figures on Materials, Wastes and Recycling |  
597 US EPA [WWW Document]. URL [https://www.epa.gov/facts-and-figures-about-](https://www.epa.gov/facts-and-figures-about-materials-waste-and-recycling/national-overview-facts-and-figures-materials)  
598 [materials-waste-and-recycling/national-overview-facts-and-figures-materials](https://www.epa.gov/facts-and-figures-about-materials-waste-and-recycling/national-overview-facts-and-figures-materials) (accessed  
599 1.18.22).
- 600 Faust, K., Raes, J., 2016. CoNet app: inference of biological association networks using  
601 Cytoscape. *F1000Research* 5, 1519. <https://doi.org/10.12688/f1000research.9050.2>
- 602 Geesink, P., Wegner, C., Probst, A.J., Herrmann, M., Dam, H.T., Kaster, A., Küsel, K., 2020.  
603 Genome-inferred spatio-temporal resolution of an uncultivated *Roizmanbacterium*  
604 reveals its ecological preferences in groundwater. *Environ. Microbiol.* 22, 726–737.  
605 <https://doi.org/10.1111/1462-2920.14865>
- 606 Gorrie, P., 2019. Toronto Advances RNG Projects | BioCycle [WWW Document]. URL  
607 <https://www.biocycle.net/toronto-advances-rng-projects/> (accessed 11.17.21).
- 608 Guilford, N., 2017. The Anaerobic Digestion of Organic Solid Wastes of Variable  
609 Composition | TSpace Repository [WWW Document]. URL  
610 <https://tspace.library.utoronto.ca/handle/1807/80954> (accessed 11.17.21).
- 611 Guilford, N., 2009. A New Technology for the Anaerobic Digestion of Organic Waste |  
612 TSpace Repository [WWW Document]. URL  
613 <https://tspace.library.utoronto.ca/handle/1807/18314?mode=full> (accessed 11.17.21).
- 614 Guilford, N.G.H., Lee, H.P., Kanger, K., Meyer, T., Edwards, E.A., 2019. Solid-State  
615 Anaerobic Digestion of Mixed Organic Waste: The Synergistic Effect of Food Waste  
616 Addition on the Destruction of Paper and Cardboard. *Environ. Sci. Technol.* 53, 12677–  
617 12687. <https://doi.org/10.1021/acs.est.9b04644>
- 618 Kanger, K., Guilford, N.G.H., Lee, H.W., Nesbø, C.L., Truu, J., Edwards, E.A., 2020.  
619 Antibiotic resistome and microbial community structure during anaerobic co-digestion  
620 of food waste, paper and cardboard. *FEMS Microbiol. Ecol.* 96.  
621 <https://doi.org/10.1093/FEMSEC/FIAA006>
- 622 Lai, M., 2019. *Bergey's Manual of Systematics of Archaea and Bacteria*, *Bergey's Manual of*  
623 *Systematics of Archaea and Bacteria*. Wiley. <https://doi.org/10.1002/9781118960608>
- 624 Lee, S.H., Park, J.H., Kang, H.J., Lee, Y.H., Lee, T.J., Park, H.D., 2013. Distribution and  
625 abundance of Spirochaetes in full-scale anaerobic digesters. *Bioresour. Technol.* 145,  
626 25–32. <https://doi.org/10.1016/j.biortech.2013.02.070>
- 627 Lee, S.H., Park, J.H., Kim, S.H., Yu, B.J., Yoon, J.J., Park, H.D., 2015. Evidence of  
628 syntrophic acetate oxidation by Spirochaetes during anaerobic methane production.  
629 *Bioresour. Technol.* 190, 543–549. <https://doi.org/10.1016/j.biortech.2015.02.066>
- 630 Leven, L., Eriksson, A.R.B., Schnurer, A., 2007. Effect of process temperature on bacterial  
631 and archaeal communities in two methanogenic bioreactors treating organic household  
632 waste. *FEMS Microbiol. Ecol.* 59, 683–693. [https://doi.org/10.1111/j.1574-](https://doi.org/10.1111/j.1574-6941.2006.00263.x)  
633 [6941.2006.00263.x](https://doi.org/10.1111/j.1574-6941.2006.00263.x)

- 634 Li, Y., Park, S.Y., Zhu, J., 2011. Solid-state anaerobic digestion for methane production from  
635 organic waste. *Renew. Sustain. Energy Rev.* <https://doi.org/10.1016/j.rser.2010.07.042>
- 636 Liu, C., Li, H., Zhang, Y., Si, D., Chen, Q., 2016. Evolution of microbial community along  
637 with increasing solid concentration during high-solids anaerobic digestion of sewage  
638 sludge. *Bioresour. Technol.* 216, 87–94. <https://doi.org/10.1016/j.biortech.2016.05.048>
- 639 Liu, C.H., Chang, C.Y., Cheng, C.L., Lee, D.J., Chang, J.S., 2012. Fermentative hydrogen  
640 production by *Clostridium butyricum* CGS5 using carbohydrate-rich microalgal  
641 biomass as feedstock, in: *International Journal of Hydrogen Energy*. Pergamon, pp.  
642 15458–15464. <https://doi.org/10.1016/j.ijhydene.2012.04.076>
- 643 Maus, I., Wibberg, D., Stantscheff, R., Eikmeyer, F.G., Seffner, A., Boelter, J.,  
644 Szczepanowski, R., Blom, J., Jaenicke, S., König, H., Pühler, A., Schlüter, A., 2012.  
645 Complete genome sequence of the hydrogenotrophic, methanogenic archaeon  
646 *Methanoculleus bourgensis* strain MS2T, isolated from a sewage sludge digester. *J.*  
647 *Bacteriol.* <https://doi.org/10.1128/JB.01292-12>
- 648 McIntyre, M.S., 2007. City of Ottawa IC&I 3Rs Management Strategy Scoping Document  
649 FINAL-APPENDICES.
- 650 McMurdie, P.J., Holmes, S., 2013. phyloseq: An R Package for Reproducible Interactive  
651 Analysis and Graphics of Microbiome Census Data. *PLoS One* 8, e61217.  
652 <https://doi.org/10.1371/journal.pone.0061217>
- 653 Mo, S., Kim, B.S., Yun, S.J., Lee, J.J., Yoon, S.H., Oh, C.H., 2015. Genome sequencing of  
654 *Clostridium butyricum* DKU-01, isolated from infant feces. *Gut Pathog.* 7, 1–7.  
655 <https://doi.org/10.1186/s13099-015-0055-3>
- 656 Qiao, J.T., Qiu, Y.L., Yuan, X.Z., Shi, X.S., Xu, X.H., Guo, R.B., 2013. Molecular  
657 characterization of bacterial and archaeal communities in a full-scale anaerobic reactor  
658 treating corn straw. *Bioresour. Technol.* 143, 512–518.  
659 <https://doi.org/10.1016/j.biortech.2013.06.014>
- 660 Qiao, W., Puentes Jácome, L.A., Tang, X., Lomheim, L., Yang, M.I., Gaspard, S., Avanzi,  
661 I.R., Wu, J., Ye, S., Edwards, E.A., 2020. Microbial Communities Associated with  
662 Sustained Anaerobic Reductive Dechlorination of  $\alpha$ -,  $\beta$ -,  $\gamma$ -, and  $\delta$ -  
663 Hexachlorocyclohexane Isomers to Monochlorobenzene and Benzene. *Environ. Sci.*  
664 *Technol.* <https://doi.org/10.1021/acs.est.9b05558>
- 665 Qiao, W., Yan, X., Ye, J., Sun, Y., Wang, W., Zhang, Z., 2011. Evaluation of biogas  
666 production from different biomass wastes with/without hydrothermal pretreatment.  
667 *Renew. Energy* 36, 3313–3318.
- 668 R Core Team, 2013. R: A language and environment for statistical computing. R Foundation  
669 for Statistical Computing, Vienna, Austria. [WWW Document]. URL  
670 [https://www.gbif.org/tool/81287/r-a-language-and-environment-for-statistical-](https://www.gbif.org/tool/81287/r-a-language-and-environment-for-statistical-computing#citation)  
671 [computing#citation](https://www.gbif.org/tool/81287/r-a-language-and-environment-for-statistical-computing#citation) (accessed 6.27.20).
- 672 Rintala, J.A., Puhakka, J.A., 1994. Anaerobic treatment in pulp- and paper-mill waste  
673 management: A review. *Bioresour. Technol.* 47, 1–18. [https://doi.org/10.1016/0960-](https://doi.org/10.1016/0960-8524(94)90022-1)  
674 [8524\(94\)90022-1](https://doi.org/10.1016/0960-8524(94)90022-1)
- 675 Sakai, S., Ehara, M., Tseng, I.C., Yamaguchi, T., Bräuer, S.L., Cadillo-Quiroz, H., Zinder,  
676 S.H., Imachi, H., 2012. *Methanolinea mesophila* sp. nov., a hydrogenotrophic  
677 methanogen isolated from rice field soil, and proposal of the archaeal family  
678 *Methanoregulaceae* fam. nov. within the order *Methanomicrobiales*. *Int. J. Syst. Evol.*  
679 *Microbiol.* 62, 1389–1395. <https://doi.org/10.1099/ijs.0.035048-0>

- 680 Shannon, P., Markiel, A., Ozier, O., Baliga, N.S., Wang, J.T., Ramage, D., Amin, N.,  
681 Schwikowski, B., Ideker, T., 2003. Cytoscape: A software Environment for integrated  
682 models of biomolecular interaction networks. *Genome Res.* 13, 2498–2504.  
683 <https://doi.org/10.1101/gr.1239303>
- 684 Singh, N., Kendall, M.M., Liu, Y., Boone, D.R., 2005. Isolation and characterization of  
685 methylotrophic methanogens from anoxic marine sediments in Skan Bay, Alaska:  
686 Description of *Methanococcoides alaskense* sp. nov., and emended description of  
687 *Methanosarcina baltica*. *Int. J. Syst. Evol. Microbiol.* 55, 2531–2538.  
688 <https://doi.org/10.1099/ijs.0.63886-0>
- 689 Sowers, K.R., Baron, S.F., Ferry, J.G., 1984. *Methanosarcina acetivorans* sp. nov., an  
690 Acetotrophic Methane-Producing Bacterium Isolated from Marine Sediments. *Appl.*  
691 *Environ. Microbiol.* 47, 971–978. <https://doi.org/10.1128/aem.47.5.971-978.1984>
- 692 Statistics Canada, 2010. Waste Management Industry Survey: Business and Government  
693 Sectors.
- 694 Stoddard, S.F., Smith, B.J., Hein, R., Roller, B.R.K., Schmidt, T.M., 2015. rrnDB: Improved  
695 tools for interpreting rRNA gene abundance in bacteria and archaea and a new  
696 foundation for future development. *Nucleic Acids Res.* 43, D593–D598.  
697 <https://doi.org/10.1093/nar/gku1201>
- 698 Tokuda, G., Mikaelyan, A., Fukui, C., Matsuura, Y., Watanabe, H., Fujishima, M., Brune,  
699 A., 2018. Fibre-associated spirochetes are major agents of hemicellulose degradation in  
700 the hindgut of wood-feeding higher termites. *Proc. Natl. Acad. Sci. U. S. A.* 115,  
701 E11996–E12004. <https://doi.org/10.1073/pnas.1810550115>
- 702 Town, J.R., Dumonceaux, T.J., 2016. Laboratory-scale bioaugmentation relieves acetate  
703 accumulation and stimulates methane production in stalled anaerobic digesters. *Appl.*  
704 *Microbiol. Biotechnol.* 100, 1009–1017. <https://doi.org/10.1007/s00253-015-7058-3>
- 705 Van, D.P., Fujiwara, T., Tho, B.L., Toan, P.P.S., Minh, G.H., 2020. A review of anaerobic  
706 digestion systems for biodegradable waste: Configurations, operating parameters, and  
707 current trends. *Environ. Eng. Res.* <https://doi.org/10.4491/eer.2018.334>
- 708 Větrovský, T., Baldrian, P., 2013. The Variability of the 16S rRNA Gene in Bacterial  
709 Genomes and Its Consequences for Bacterial Community Analyses. *PLoS One* 8, 1–10.  
710 <https://doi.org/10.1371/journal.pone.0057923>
- 711 Von Klein, D., Arab, H., Völker, H., Thomm, M., 2002. *Methanosarcina baltica*, sp. nov., a  
712 novel methanogen isolated from the Gotland Deep of the Baltic Sea. *Extremophiles* 6,  
713 103–110. <https://doi.org/10.1007/s007920100234>
- 714 Wilkins, D., Rao, S., Lu, X., Lee, P.K.H., 2015. Effects of sludge inoculum and organic  
715 feedstock on active microbial communities and methane yield during anaerobic  
716 digestion. *Front. Microbiol.* 6. <https://doi.org/10.3389/fmicb.2015.01114>
- 717 Wrighton, K.C., Castelle, C.J., Varaljay, V.A., Satagopan, S., Brown, C.T., Wilkins, M.J.,  
718 Thomas, B.C., Sharon, I., Williams, K.H., Tabita, F.R., Banfield, J.F., 2016. RubisCO  
719 of a nucleoside pathway known from Archaea is found in diverse uncultivated phyla in  
720 bacteria. *ISME J.* 10, 2702–2714. <https://doi.org/10.1038/ismej.2016.53>

723

724

725

726

727

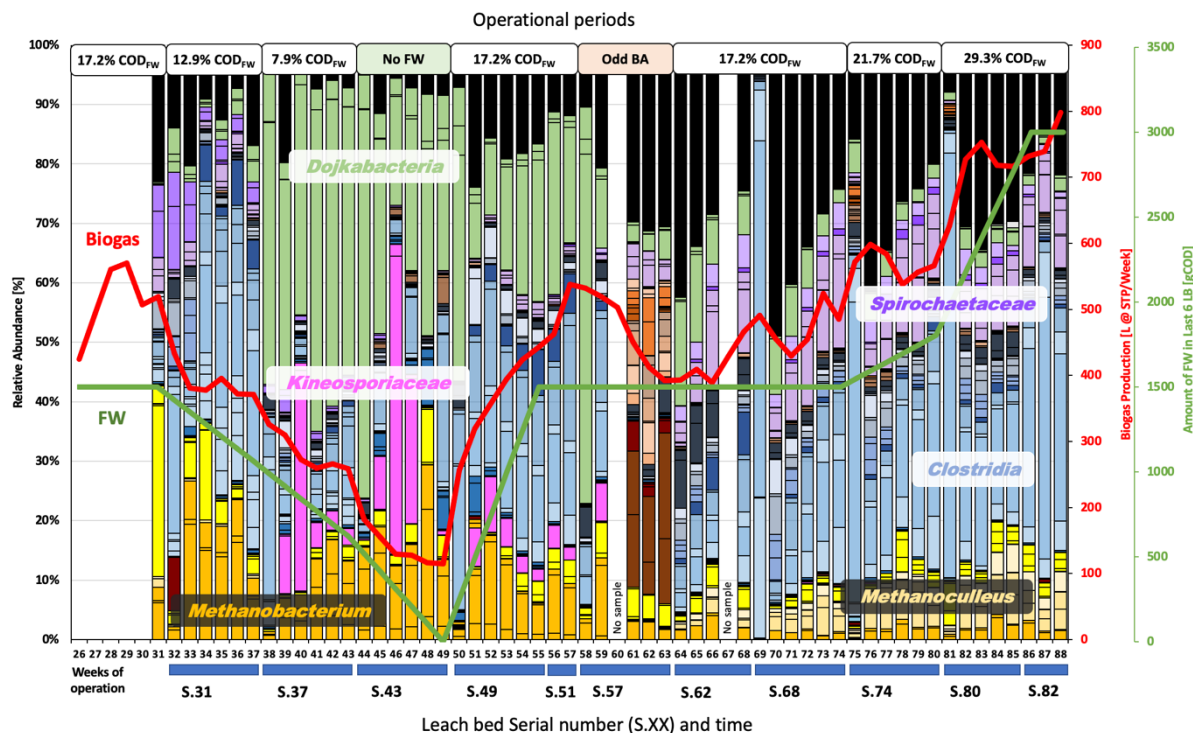

728

729

730

731

732

733

734

735

736

737

738

739

740

741

742

743

**Figure 1. Overview of microbial and process data in Daisy.** The relative abundance of microbial community members in weekly leachate samples collected from a given numbered leach bed (stacked bars) is shown in relation to the weekly biogas production rate (red line) and total amount of food waste in the system (gCOD) in the most recent 3 leach beds (green line) from Weeks 26 to 88. The operational periods (top row) show the amount of food waste added to each new leach bed in the corresponding time frame. Odd BA refers to a period with 17.2% COD from FW but a different batch of bulking agent. Shown are the data from sampling the leachate from the first leach bed of a new operational period (referred to as Set 1). Taxa are colour-coded for better visualization. ASVs belonging to *candidate* division Dojkabacteria are shown in green with ASV6777 dominating, particularly as the proportion of food waste dropped to zero. ASVs belonging to *Clostridium* (blue colors) became relatively more abundant when more food waste was present in the system. Archaea are shown in yellow/orange hues. The weekly biogas production appears to correlate well to the amount of food waste added (red and green lines).

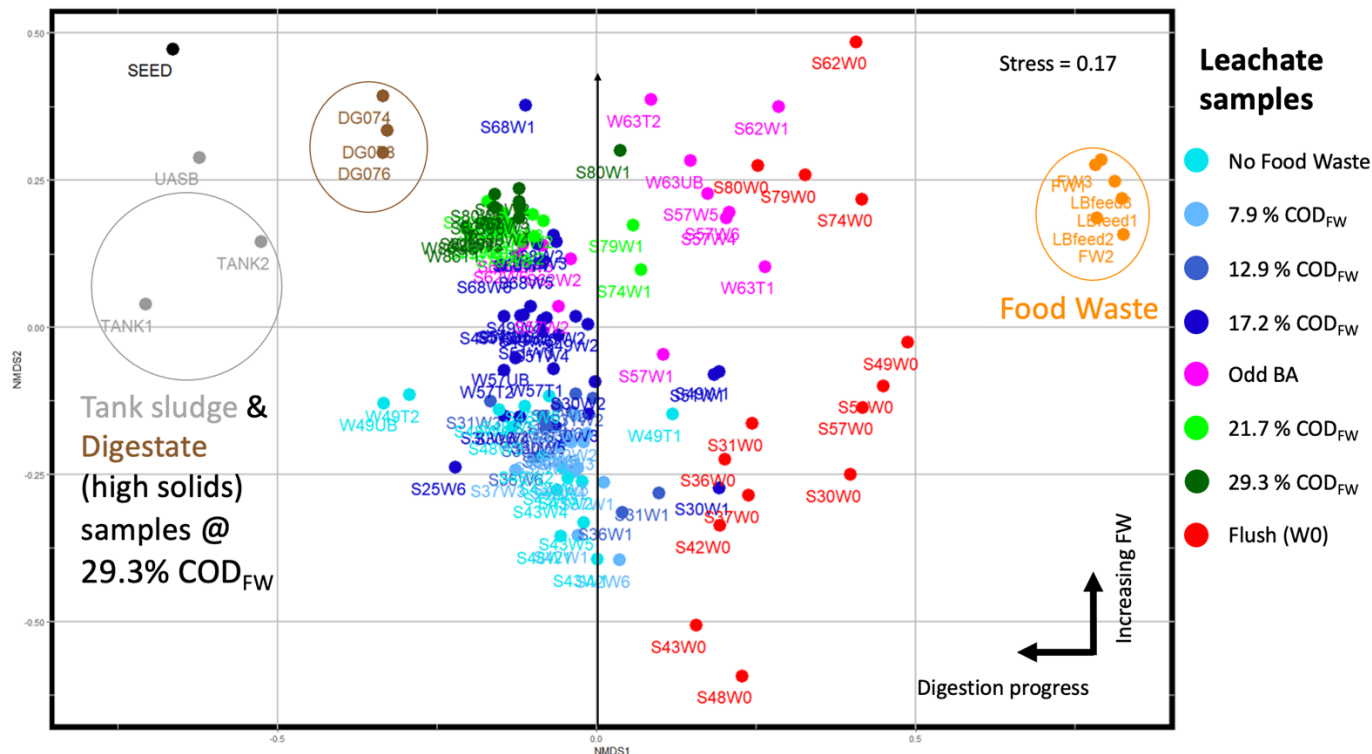

744

745

746 **Figure 2. Ordination (NMDS) of Bacterial amplicon sequence data using absolute**  
 747 **abundance.** Data are color-coded based on amount of FW in the leach bed except for first  
 748 flush and Odd BA samples. Data from all samples are plotted, including leachate, first flush  
 749 (W0), food waste (FW) and leach bed feed, digestate (DG), tank sludge, UASB, and original  
 750 Daisy inoculum (seed). First flush samples (Red) are closest to the food waste and leach bed  
 751 feed samples (Orange). First flush samples are spread vertically based on the amount of food  
 752 waste added to the respective leach bed. This was also evident in **Figures S4 and S5**, where  
 753 number of ASVs with gammaproteobacterial taxonomic assignments were found in both food  
 754 waste (FW) and **Flush** samples. Samples from leach beds containing less food waste (0 – 12.9  
 755 % COD<sub>FW</sub>, blue tones) clustered below the origin, while those containing more food waste s  
 756 (21.7 and 29.3 COD<sub>FW</sub>, green tone) clustered above the origin., with samples containing 17.2%  
 757 COD<sub>FW</sub> (Navy) between. Samples collected from leach beds with odd BA (pink) tended to  
 758 resemble first flush samples, owing to abundant ASVs with gammaproteobacterial assignment.  
 759

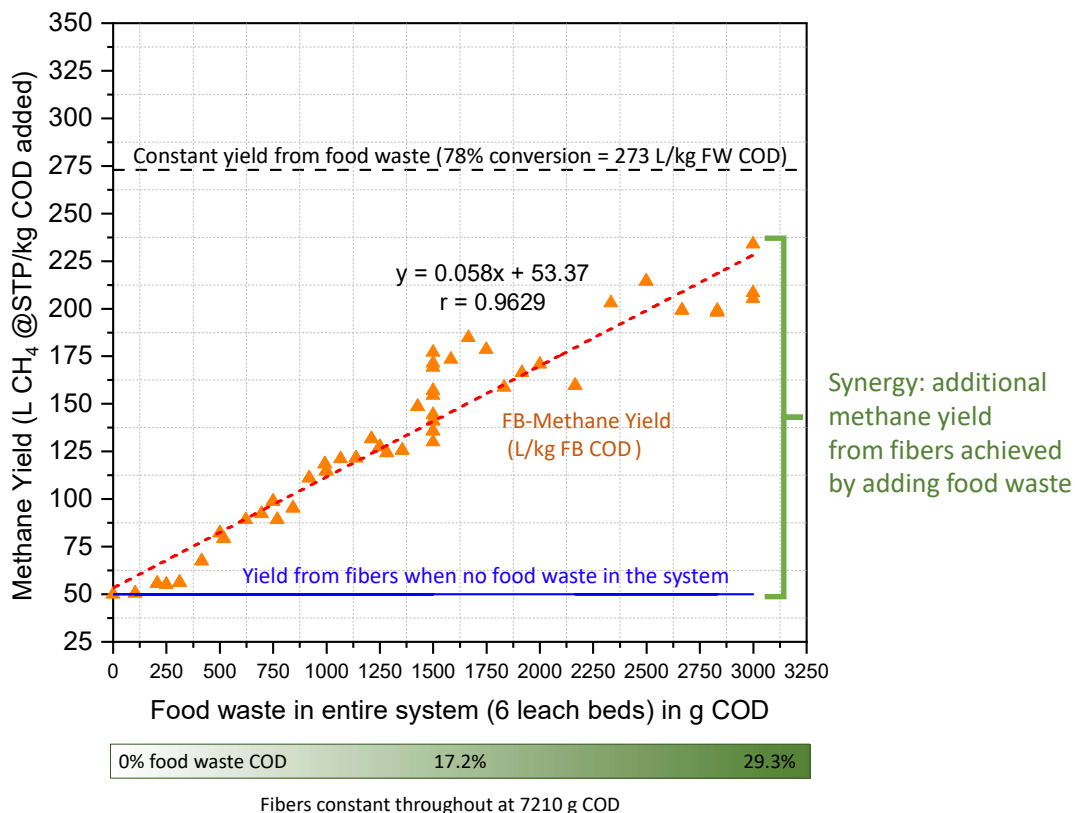

760  
 761 **Figure 3. Methane yield from fibers (FB) in L /kg FB<sub>COD</sub> added as a function of the**  
 762 **amount of food waste in the system from all six leach beds.** The regression line and Pearson  
 763 correlation coefficient *r* show a linear relationship between the amount of food waste (FW)  
 764 added and FB methane yield. Understanding why food waste contributed to this “synergistic  
 765 methane” is the main objective of this study. The methane generated from fibers was calculated  
 766 by subtracting the predicted methane produced from the added food waste (assuming 78%  
 767 conversion of FW to methane) from total methane produced in the system (see Guilford et al.,  
 768 2019), and Figure S3 and Table S11 for more information. Each leach bed contained a constant  
 769 mass of fibers equivalent to 7210 g COD, while Food Waste COD varied from 0 to 3000  
 770 gCOD.  
 771



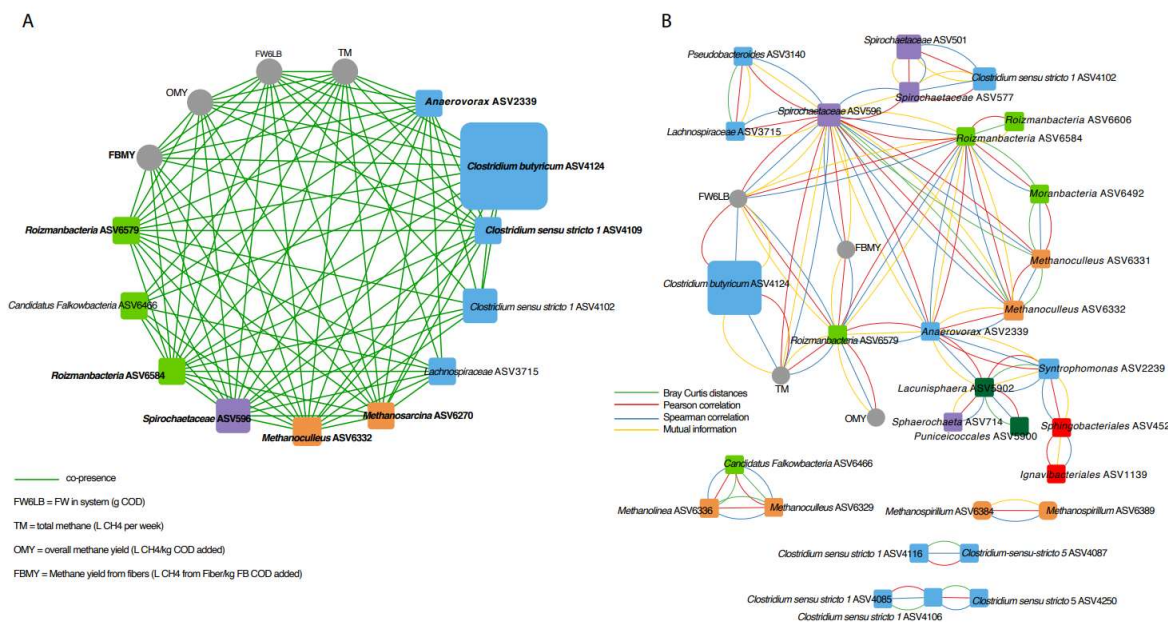

772  
 773 **Figure 4. Co-occurrence networks between ASVs and process parameters. A:** Subnetwork  
 774 of the full network shown in Figure S11 including only the eleven ASVs significantly  
 775 correlated with process metadata. Green edges indicate a positive correlation. **B:** A more  
 776 stringent network of all ASVs where at least three correlation measures must be significant  
 777 based on unmerged or individual FDR values. Edges were colored based on test method (green:  
 778 Bray-Curtis distances; red: Pearson correlation; blue: Spearman correlation; yellow: Mutual  
 779 information). In both panels A and B, process metadata are shown as grey circles and ASVs  
 780 are shown as squares with size proportional to absolute abundance and coloured according to  
 781 phylum (red: *Bacteroidetes*, orange: *Euryarchaeota*, blue: *Firmicutes*, green: *Patecibacteria*,  
 782 purple: *Spirochaetes*, dark green: *Verrucomicrobia*).  
 783

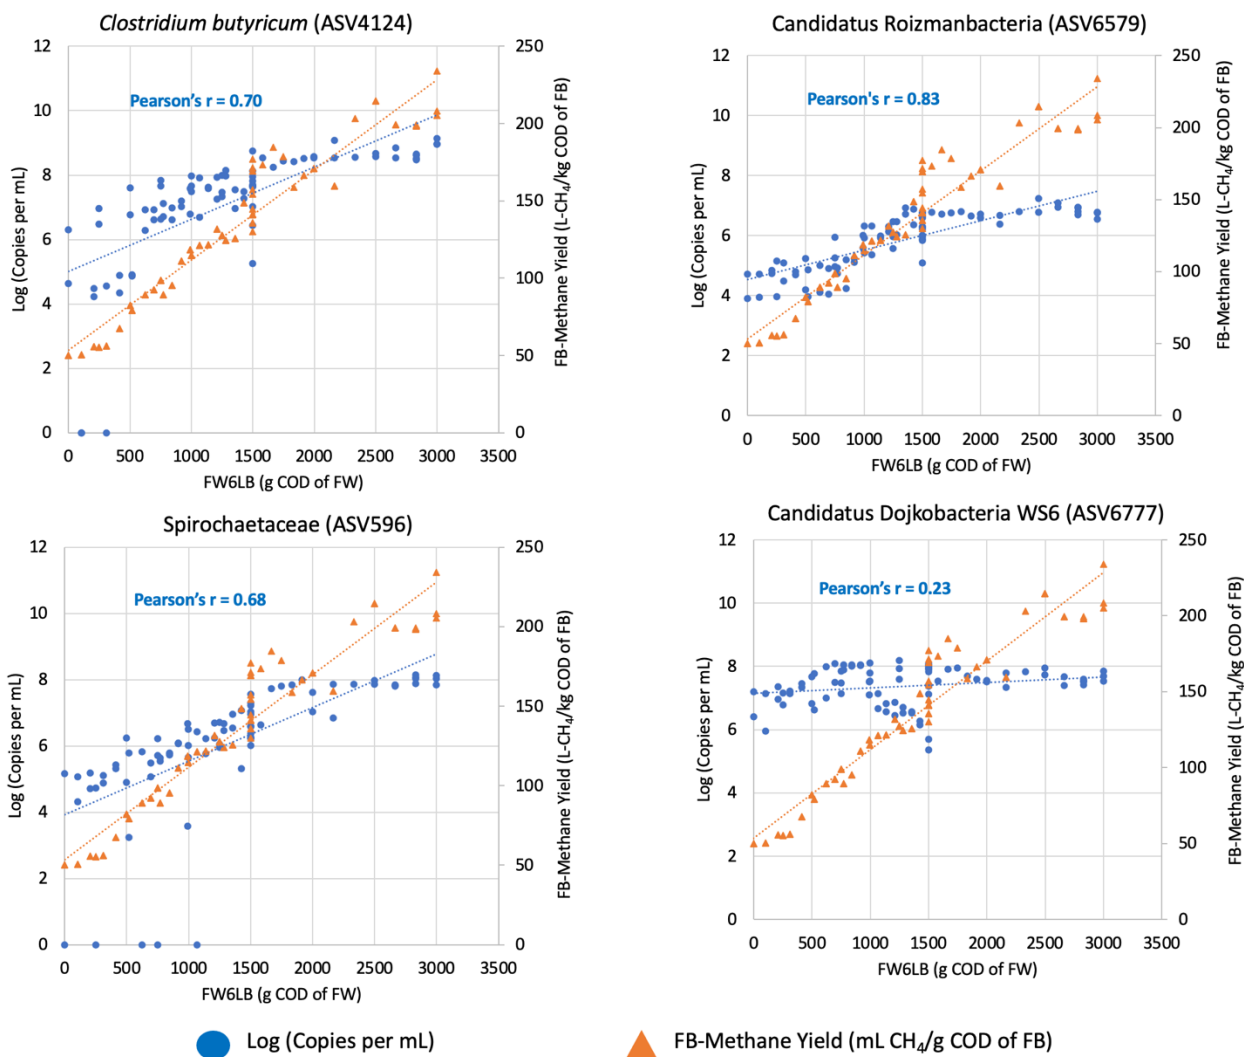

784  
785

786 **Figure 5.** Correlation of microbial phyla with system food waste and methane yield from  
787 fibres. The blue dashed line is the regression between log abundance of an ASV (copies per  
788 mL) and system food waste (total food waste in 6 leach beds). The orange dashed line is the  
789 regression between system food waste and methane yield from fibres. Pearson correlation  
790 coefficients are shown for the ASV data. Note that the ASV corresponding to Dojkabacteria  
791 (WS6) has very poor correlation. Other notable phyla shown in Figure S12.

792
